# Supplementary material for: Fluorescence and electrochemical detection of iodine vapor in the presence of high humidity using Ln-based MOFs
Source: Royal Society of Chemistry journal article supplement (doi:10.1039/d1dt02839a), 2021-01-01
Supplement: d1dt02839a1.pdf [file d1dt02839a1.pdf]

## Electronic Supplementary Material

# Fluorescent and Electrochemical Detection of Iodine Vapor in the Presence of High Humidity using Ln-based MOFs

Xiuting Dong,<sup>a, b</sup> Qing He,<sup>a</sup> Menglin Li,<sup>a, b</sup> Xinpeng Wang,<sup>a, b</sup> Yuxin Wang,<sup>a, b</sup> Wen Zhang<sup>\*, a, b</sup>

<sup>a</sup>School of Chemical Engineering and Technology, Tianjin University, Tianjin 300350, China.

<sup>b</sup>State Key Laboratory of Chemical Engineering, Tianjin Key Laboratory of Membrane Science & Desalination Technology, Tianjin 300350, China.

\*To whom correspondence should be addressed. zhang\_wen@tju.edu.cn (W. Z.)

## Table of Contents

- Figure S1.** Adsorption curves of Ln-BTCs and De-Ln-BTCs in saturated iodine vapor at 80 °C
- Figure S2.** Elution ratios of adsorbed iodine via ethanol soaking
- Figure S3.** Adsorption curves of Ln-BTCs in saturated iodine vapor with 18% RH at 80 °C
- Figure S4.** PXRD patterns of I<sub>2</sub>@Eu-BTC under 18% relative humidity, De-Eu-BTC, I<sub>2</sub>@De-Eu-BTC and iodine-loaded samples after elution
- Figure S5.** PXRD patterns of I<sub>2</sub>@Tb-BTC under 18% relative humidity, De-Tb-BTC, I<sub>2</sub>@De-Tb-BTC and iodine-loaded samples after elution
- Figure S6.** Water adsorption curves of Ln-BTCs in 18% relative humidity at 80 °C
- Figure S7.** Emission spectra of I<sub>2</sub>@Dy-BTC
- Figure S8.** Emission spectra of I<sub>2</sub>@Er-BTC
- Figure S9.** Emission spectra of I<sub>2</sub>@Yb-BTC
- Figure S10.** Solid-state UV-Vis spectrum of I<sub>2</sub> and emission spectrum of Eu-BTC
- Figure S11.** XPS spectra of I 3d in Iodine-loaded Eu-BTC after treating in vacuum for 12 h at 100 °C
- Figure S12.** Impedance response plots of Eu-BTC upon iodine and/or water uptake with different weight percents
- Figure S13.** The reuse performance of Eu-BTC using impedance response
- Figure S14.** Adsorption curves of Eu-BTC monocrystal in saturated iodine vapor at 80°C
- Table S1** Iodine-loading-induced increase of the electric conductivity for MOFs

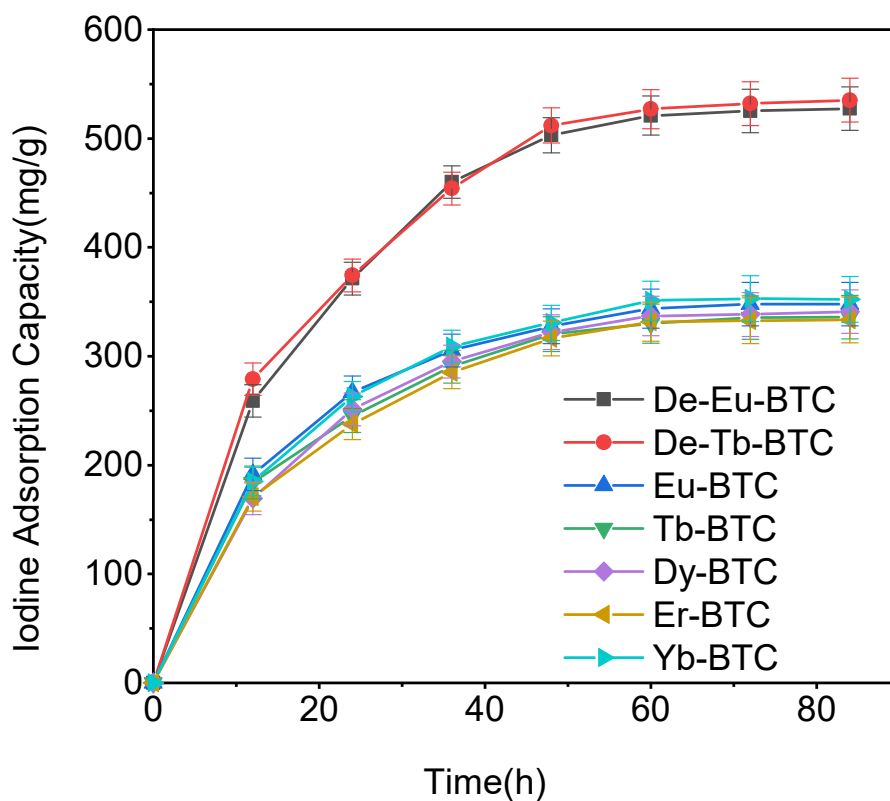

**Figure S1.** Adsorption curves of Ln-BTCs and De-Ln-BTCs in saturated iodine vapor at 80°C

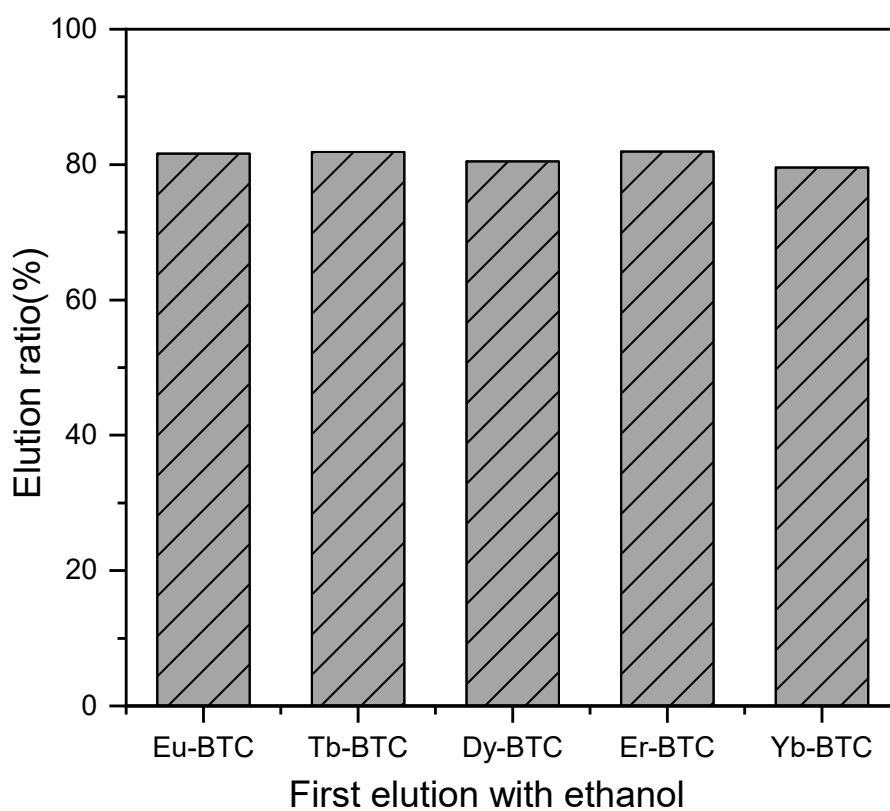

**Figure S2.** Elution ratios of adsorbed iodine via ethanol soaking

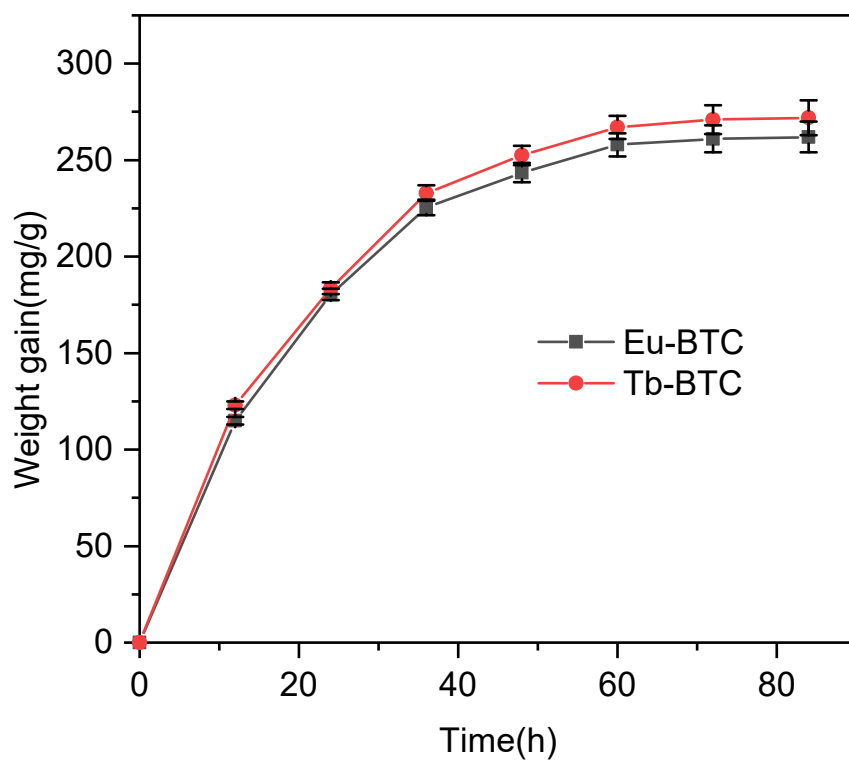

**Figure S3.** Adsorption curves of Ln-BTCs in saturated iodine vapor with 18% relative humidity at 80°C

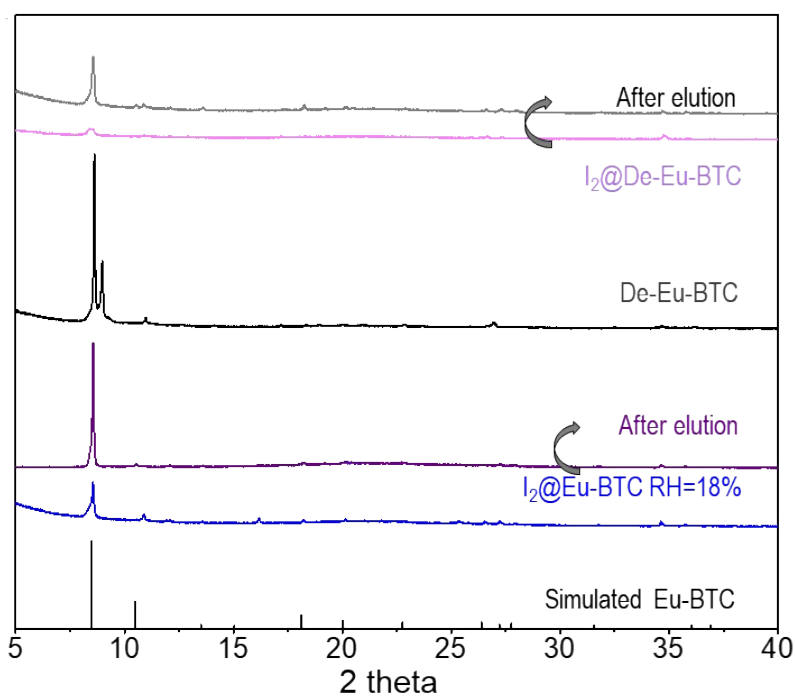

**Figure S4.** PXRD patterns of  $I_2@Eu-BTC$  under 18% relative humidity,  $De-Eu-BTC$ ,  $I_2@De-Eu-BTC$  and iodine-loaded samples after elution.

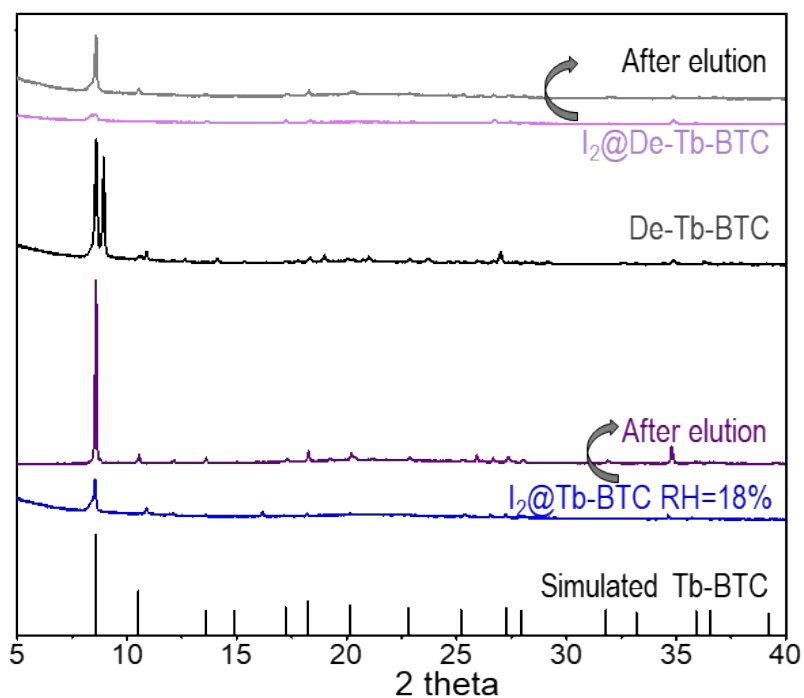

**Figure S5.** PXRD patterns of  $I_2@Tb-BTC$  under 18% relative humidity, De-Tb-BTC,  $I_2@De-Tb-BTC$  and iodine-loaded samples after elution.

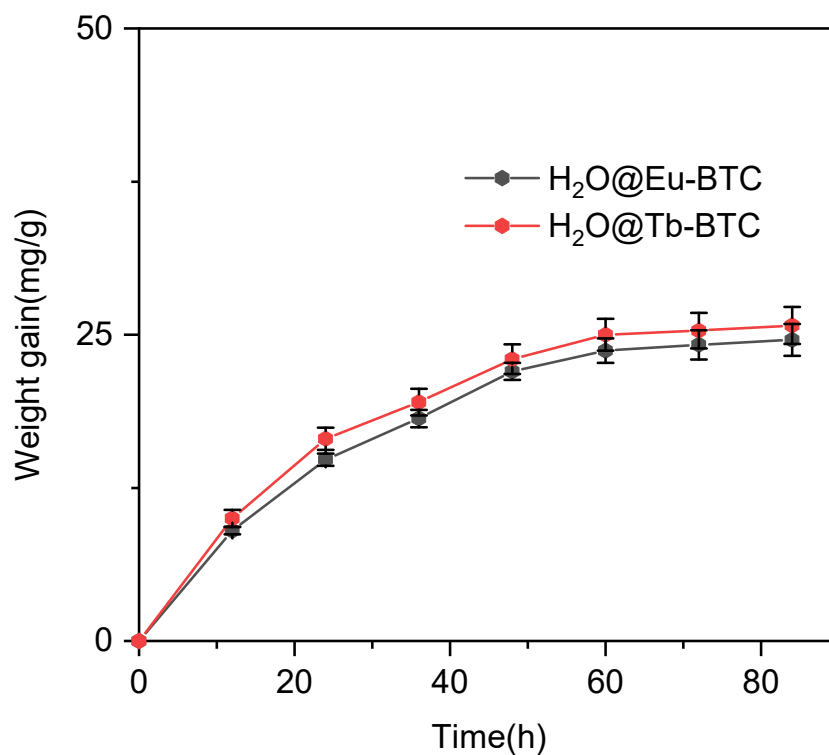

**Figure S6.** Water adsorption curves of Ln-BTCs in 18% relative humidity at 80 °C (The vial with 30 mg Ln-BTC was introduced into in a sealed bottle which contains 3 mL saturated calcium chloride aqueous solution. The bottle was placed in an 80 °C oven).

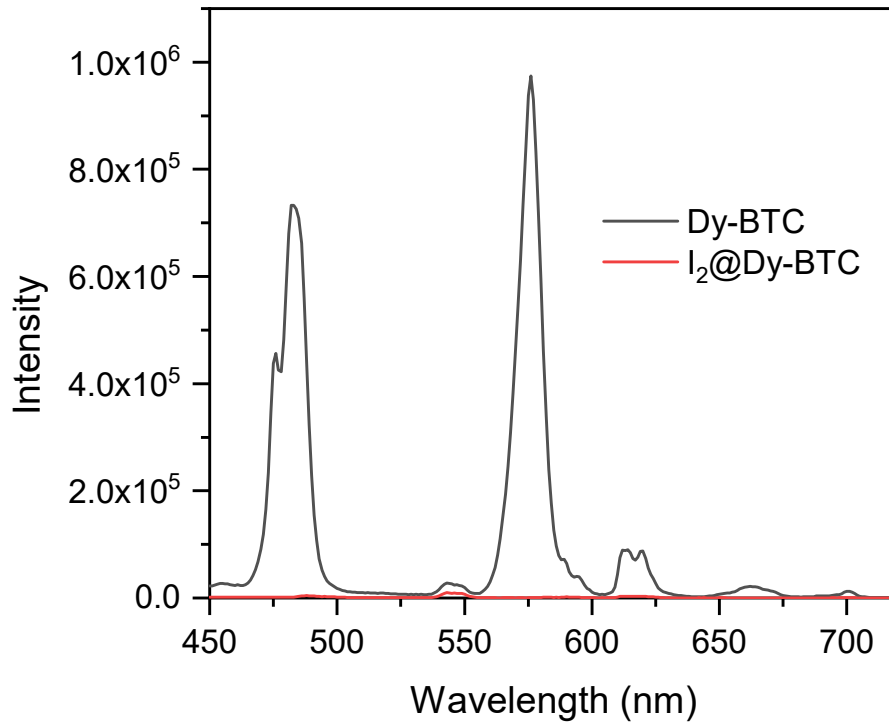

**Figure S7.** Emission spectra of I<sub>2</sub>@Dy-BTC with an excitation wavelength of  $\lambda_{\text{ex}}=297$  nm

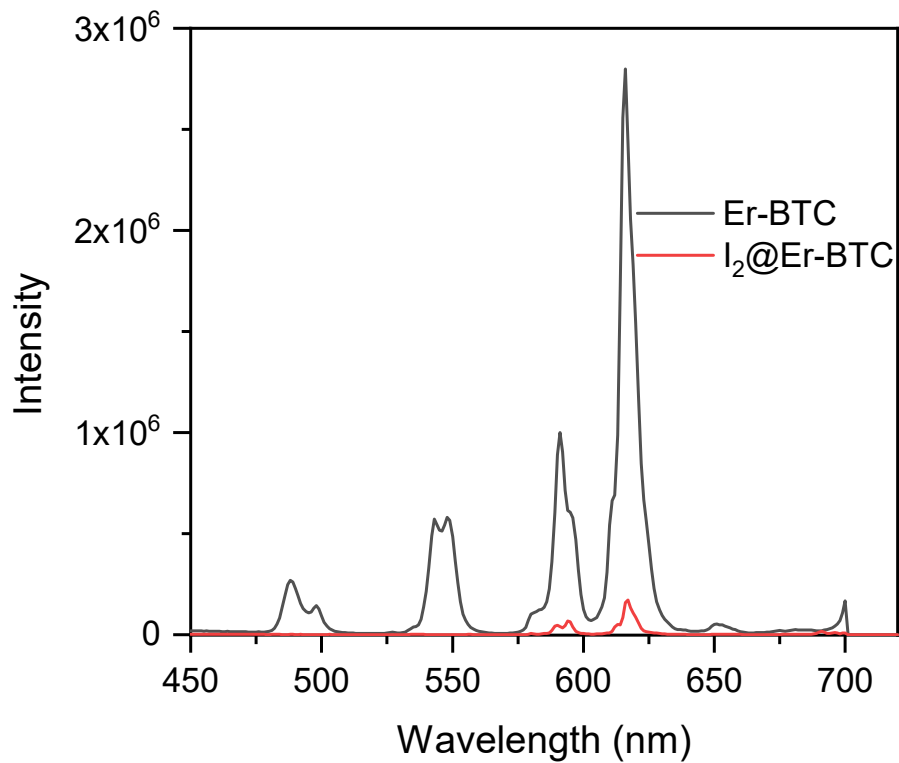

**Figure S8.** Emission spectra of I<sub>2</sub>@Er-BTC with an excitation wavelength of  $\lambda_{\text{ex}}=297$  nm

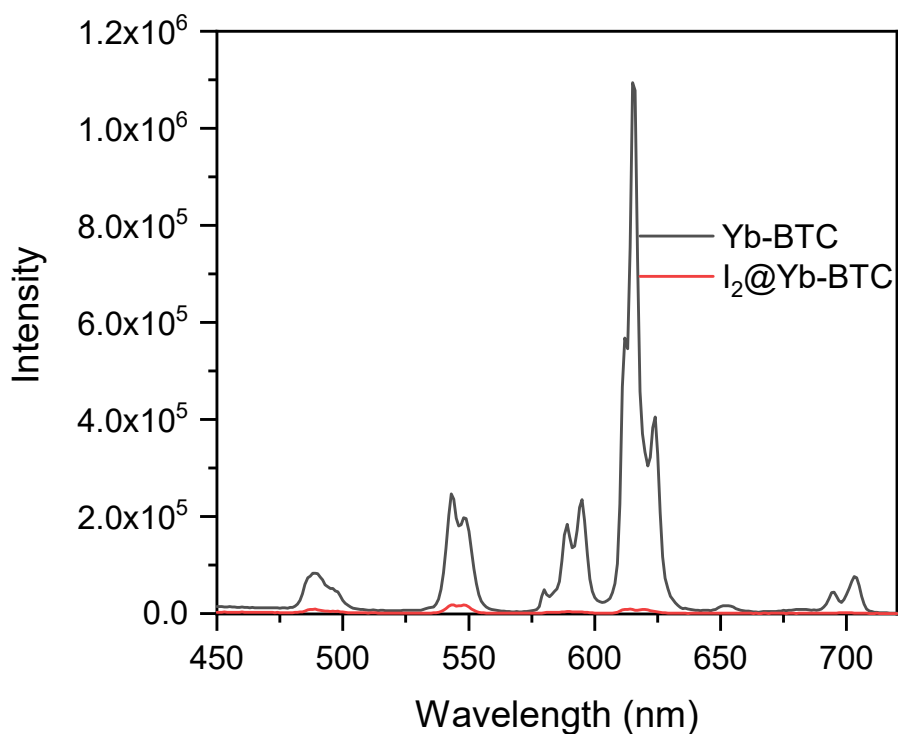

**Figure S9.** Emission spectra of I<sub>2</sub>@Yb-BTC with an excitation wavelength of  $\lambda_{\text{ex}}=297$  nm

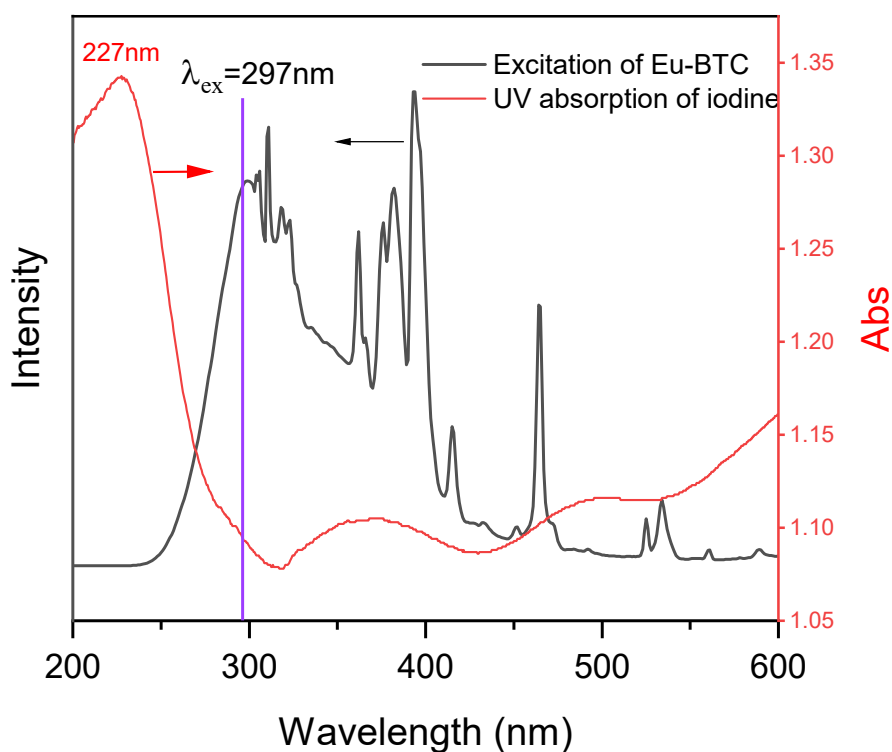

**Figure S10.** Solid-state UV-Vis spectrum of I<sub>2</sub> and emission spectrum of Eu-BTC

(The solid-state UV-Vis spectra of iodine was measured using a SHIMADZU UV-2600 UV-Vis-NIR spectrophotometer at room temperature. The excitation spectrum of Eu-BTC powder was measured using a Jobin Yvon Fluorolog3-21 coupled with a 400 nm longpass filter with a Xe 450W ozone-free continuous xenon arc lamp and a 2 nm slit width, monitored at 620 nm.)

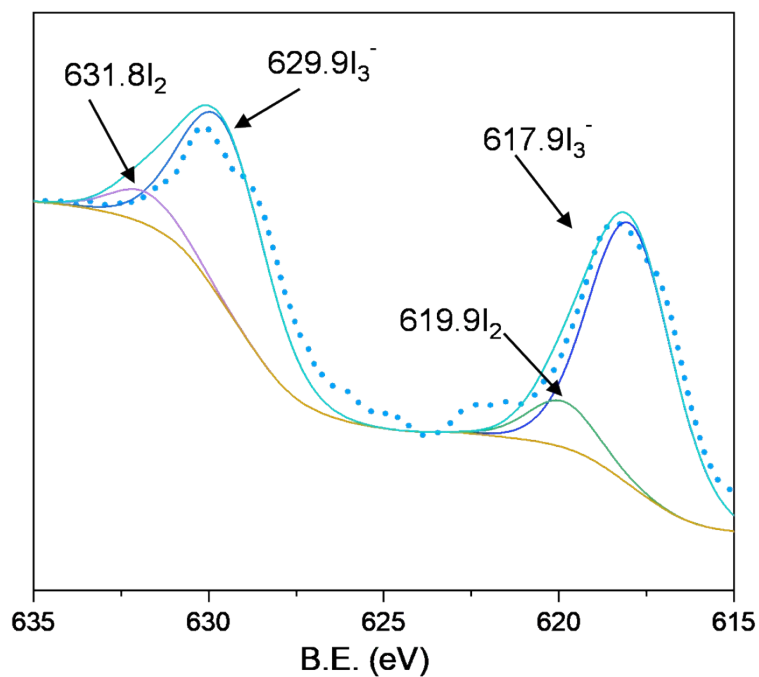

**Figure S11.** XPS spectra of I 3d in Iodine-loaded Eu-BTC after treating in vacuum for 12 h at 100 °C (X-ray photoelectron spectroscopy (XPS), Thermo ESCALAB 250Xi, C 1s at 285 eV)

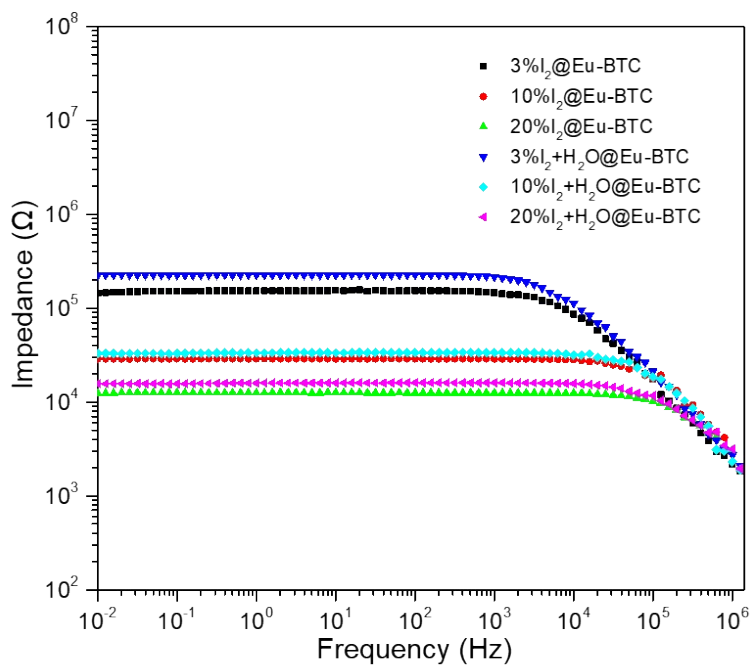

**Figure S12.** Impedance response plots of Eu-BTC upon iodine and/or water uptake with different weight percents



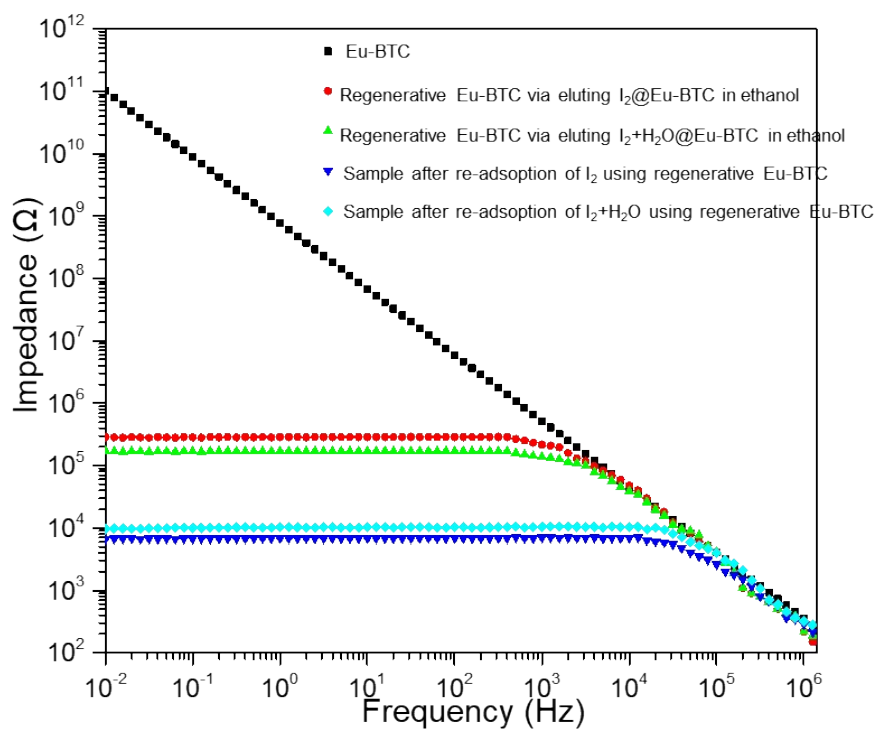

**Figure S13.** The reuse performance of Eu-BTC using impedance response

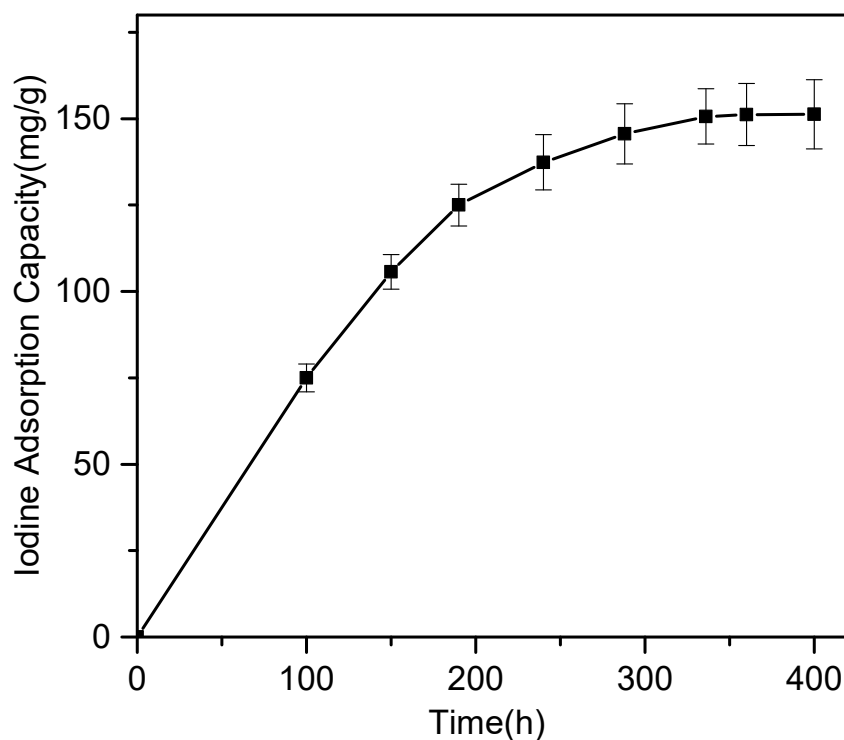

**Figure S14.** Adsorption curves of Eu-BTC monocystal in saturated iodine vapor at 80 °C (A vial with 30 mg Ln-BTC monocystal were introduced into in a sealed bottle which contains about 1.5 g solid iodine for iodine uptake. The bottle was placed in an oven and kept at 80 °C)

**Table S1** Iodine-loading-induced increase of the electric conductivity for MOFs

| MOFs                                                                                                              | Iodine capability wt% | conductivity for MOFs (S/cm) | conductivity for I <sub>2</sub> -loaded MOFs (S/cm) | Times                | Ref       |
|-------------------------------------------------------------------------------------------------------------------|-----------------------|------------------------------|-----------------------------------------------------|----------------------|-----------|
| Eu <sub>4</sub> (BPT) <sub>4</sub> (DMF) <sub>2</sub> (H <sub>2</sub> O) <sub>8</sub>                             | 17.41                 | 8.27×10 <sup>-7</sup>        | 2.71×10 <sup>-5</sup>                               | 33                   | [1]       |
| {(Na <sub>2</sub> I <sub>2</sub> CB[6])·8H <sub>2</sub> O·1.4I <sub>2</sub> } )                                   | 25                    | —                            | 7.46×10 <sup>-7</sup>                               | —                    | [2]       |
| [Co <sub>1.5</sub> (BDC) <sub>1.5</sub> (H <sub>2</sub> BPZ)]·DMF·4H <sub>2</sub> O                               | 20.2                  | 2.59×10 <sup>-9</sup>        | 7.69×10 <sup>-6</sup>                               | 2.97×10 <sup>3</sup> | [3]       |
| [Tb(Cu <sub>4</sub> I <sub>4</sub> )(ina) <sub>3</sub> (DMF)]                                                     | 22.6                  | 5.72×10 <sup>-11</sup>       | 2.16×10 <sup>-4</sup>                               | 3.78×10 <sup>6</sup> | [4]       |
| ZIF-8                                                                                                             | 116                   | —                            | —                                                   | ×10 <sup>5</sup>     | [5]       |
| MFM-300(In)                                                                                                       | 15                    | —                            | —                                                   | ×10 <sup>6</sup>     | [6]       |
| MFM-300(V <sup>III</sup> )                                                                                        | —                     | 1.7×10 <sup>-10</sup>        | 1.2×10 <sup>-4</sup>                                | 7.06×10 <sup>5</sup> | [7]       |
| [Ca <sub>2</sub> (TBAPy)(OH <sub>2</sub> ) <sub>2</sub> ]·2DMF                                                    | 25                    | <10 <sup>-9</sup>            | 5.3×10 <sup>-6</sup>                                | >10 <sup>3</sup>     | [8]       |
| [DMA][In(TDC) <sub>2</sub> ]                                                                                      | 56                    | 1.3×10 <sup>-11</sup>        | 2.8×10 <sup>-8</sup>                                | 2.15×10 <sup>3</sup> | [9]       |
| dhMOF                                                                                                             | 17                    | 2×10 <sup>-8</sup>           | 2.6×10 <sup>-4</sup>                                | 1.30×10 <sup>4</sup> | [10]      |
| Fe-MET-3                                                                                                          | —                     | 0.77×10 <sup>-4</sup>        | 1×10 <sup>-3</sup>                                  | 13                   | [11]      |
| Cu[Ni(pdt) <sub>2</sub> ]                                                                                         | —                     | 1×10 <sup>-8</sup>           | 1.2×10 <sup>-4</sup>                                | 1.20×10 <sup>4</sup> | [12]      |
| [Cu <sub>6</sub> (pybz) <sub>8</sub> (OH) <sub>2</sub> ]·I <sub>5</sub> <sup>-</sup> ·I <sub>7</sub> <sup>-</sup> | 85                    | 8.04×10 <sup>-9</sup>        | 8.11×10 <sup>-7</sup>                               | 1×10 <sup>2</sup>    | [13]      |
| NiPc-CoTAA                                                                                                        | —                     | 8.16×10 <sup>-3</sup>        | 0.52                                                | 64                   | [14]      |
| [(Me <sub>2</sub> NH <sub>2</sub> ) <sub>2</sub> ][Cd <sub>3</sub> (5-tbip) <sub>4</sub> ]·2DMF                   | 58                    | 1.71×10 <sup>-8</sup>        | 1.29×10 <sup>-6</sup>                               | 76                   | [15]      |
| Eu-BTC (RH=0)                                                                                                     | 33.5                  | 2.78×10 <sup>-13</sup>       | 6.08×10 <sup>-6</sup>                               | 2.19×10 <sup>7</sup> | This work |
| Eu-BTC (RH=18%)                                                                                                   | 26.1                  | 4.10×10 <sup>-11</sup>       | 1.55×10 <sup>-6</sup>                               | 3.78×10 <sup>4</sup> | This work |
| Tb-BTC (RH=0)                                                                                                     | 34.8                  | 3.78×10 <sup>-13</sup>       | 6.62×10 <sup>-6</sup>                               | 1.75×10 <sup>7</sup> | This work |
| Tb-BTC (RH=18%)                                                                                                   | 27.2                  | 4.57×10 <sup>-11</sup>       | 2.04×10 <sup>-6</sup>                               | 4.51×10 <sup>4</sup> | This work |

**The calculation of electrical conductivity of Ln-BTC and I<sub>2</sub>@Ln-BTC**

The conductivity is calculated according to the following equations:

$$\sigma = \frac{L}{R \times A}$$

, where  $\sigma$  = conductivity (S/cm),  $R$  = resistance,  $A$  = cross sectional area of electrodes (cm<sup>2</sup>), and  $L$  = distance between electrodes (cm).

## References

- [1] Hao, Z.; Yang, G.; Song, X.; Zhu, M.; Meng, X.; Zhao, S.; Song, S.; Zhang, H., A europium(III) based metal–organic framework: bifunctional properties related to sensing and electronic conductivity. *Journal of Materials Chemistry A* **2014**, 2 (1), 237-244.
- [2] Lin, J.-X.; Liang, J.; Feng, J.-F.; Karadeniz, B.; Lü, J.; Cao, R., Iodine uptake and enhanced electrical conductivity in a porous coordination polymer based on cucurbit[6]uril. *Inorganic Chemistry Frontiers* **2016**, 3 (11), 1393-1397.
- [3] Li, G. P.; Zhang, K.; Zhao, H. Y.; Hou, L.; Wang, Y. Y., Increased Electric Conductivity upon I<sub>2</sub> Uptake and Gas Sorption in a Pillar-Layered Metal-Organic Framework. *Chempluschem* **2017**, 82 (5), 716-720.
- [4] Hu, Y.-Q.; Li, M.-Q.; Wang, Y.; Zhang, T.; Liao, P.-Q.; Zheng, Z.; Chen, X.-M.; Zheng, Y.-Z., Direct Observation of Confined I<sup>-</sup>⋯I<sub>2</sub>⋯I<sup>-</sup> Interactions in a Metal–Organic Framework: Iodine Capture and Sensing. *Chemistry – A European Journal* **2017**, 23 (35), 8409-8413.
- [5] Small, L. J.; Nenoff, T. M., Direct Electrical Detection of Iodine Gas by a Novel Metal-Organic-Framework-Based Sensor. *ACS Applied Materials & Interfaces* **2017**, 9 (51), 44649-44655.
- [6] Small, L. J.; Hill, R. C.; Krumhansl, J. L.; Schindelholz, M. E.; Chen, Z.; Chapman, K. W.; Zhang, X.; Yang, S.; Schroder, M.; Nenoff, T. M., Reversible MOF-Based Sensors for the Electrical Detection of Iodine Gas. *ACS Applied Materials & Interfaces* **2019**, 11 (31), 27982-27988.
- [7] Zhang, X.; da Silva, I.; Fazzi, R.; Sheveleva, A. M.; Han, X.; Spencer, B. F.; Sapchenko, S. A.; Tuna, F.; McInnes, E. J. L.; Li, M.; Yang, S.; Schroder, M., Iodine Adsorption in a Redox-Active Metal-Organic Framework: Electrical Conductivity Induced by Host-Guest Charge-Transfer. *Inorganic Chemistry* **2019**, 58 (20), 14145-14150.
- [8] Gladysiak, A.; Nguyen, T. N.; Spodaryk, M.; Lee, J. H.; Neaton, J. B.; Zuttel, A.; Stylianou, K. C., Incarceration of Iodine in a Pyrene-Based Metal-Organic Framework. *Chemistry – A European Journal* **2019**, 25 (2), 501-506.
- [9] Mani, P.; Mandal, N.; Roopesh, M.; Gopalakrishnan, H.; Datta, A.; Mandal, S., Enhancement in electrical conductivity of a porous indium based metal–organic framework upon I<sub>2</sub> uptake: combined experimental and theoretical investigations. *Journal of Materials Chemistry C* **2020**, 8 (14), 4836-4842.
- [10] Gordillo, M. A.; Benavides, P. A.; Panda, D. K.; Saha, S., The Advent of Electrically Conducting Double-Helical Metal-Organic Frameworks Featuring Butterfly-Shaped Electron-Rich pi-Extended Tetrathiafulvalene Ligands. *ACS Applied Materials & Interfaces* **2020**, 12 (11), 12955-12961.
- [11] Gandara, F.; Uribe-Romo, F. J.; Britt, D. K.; Furukawa, H.; Lei, L.; Cheng, R.; Duan, X.; O'Keeffe, M.; Yaghi, O. M., Porous, conductive metal-triazolates and their structural elucidation by the charge-flipping method. *Chemistry – A European Journal* **2012**, 18 (34), 10595-601.
- [12] Kobayashi, Y.; Jacobs, B.; Allendorf, M. D.; Long, J. R., Conductivity, Doping, and Redox Chemistry of a Microporous Dithiolene-Based Metal–Organic Framework. *Chemistry of Materials* **2010**, 22 (14), 4120-4122.
- [13] Yin, Z.; Wang, Q. X.; Zeng, M. H., Iodine release and recovery, influence of polyiodide anions on electrical conductivity and nonlinear optical activity in an interdigitated and interpenetrated bipillared-bilayer metal-organic framework. *Journal of the American Chemical Society* **2012**, 134 (10), 4857-63.
- [14] Yue, Y.; Cai, P.; Xu, X.; Li, H.; Chen, H.; Zhou, H. C.; Huang, N., Conductive Metallophthalocyanine Framework Films with High Carrier Mobility as Efficient Chemiresistors. *Angewandte Chemie International Edition* **2021**, 60 (19), 10806-10813.
- [15] Chaudhari, A. K.; Mukherjee, S.; Nagarkar, S. S.; Joarder, B.; Ghosh, S. K., Bi-porous metal–organic framework with hydrophilic and hydrophobic channels: selective gas sorption and reversible iodine uptake studies. *CrystEngComm* **2013**, 15 (45), 9465.
